# Supplementary material for: A Quality-Based Review of Randomized Controlled Trials of Cognitive-Behavioral Therapy for Depression: An Assessment and Metaregression
Source: Atypon-hosted journal article supplement (doi:10.1176/appi.ajp.2011.11030433), 2011-12-30
Supplement: appi.ajp.2011.11030433_ds001.pdf [file appi.ajp.2011.11030433_ds001.pdf]

## Supplementary Material

### Keywords for Search Algorithm

In June 2010 a search was conducted using the Cochrane Centralized Database of Controlled Clinical Trials (CENTRAL). The following keywords were used in the Ovid interface: (depression/ or depressi\$ or dysthymi\$ or "affective disorder\$" or "mood disorder\$" or affective symptoms) and (cognitive therapy/ or psychotherapy rational emotive/ or (cogniti\$ and (technique\$ or therap\$ or restructur\$ or challeng\$)) or attribution\$ or (cogniti\$ and behavio\$ and therap\$) or (rational and emotiv\$)) and limit to "cochrane depression anxiety and neurosis group". (Note: "/" indicates medical subject heading (MeSH) term; \$ = wildcard.)

### Method and Formulas for Effect Size Calculation

Between-groups standardized mean difference effect sizes were generated for studies that provided sufficient information (e.g., means and standard deviations) for measures of depression using the software Comprehensive Meta-analysis 2.0 (Biostat, Englewood NJ). Hedges'  $g$  was chosen as the effect size, a variant of Cohen's  $d$  that corrects for bias in small samples (1):

$$d = \frac{(M_t - M_c)}{S_{pooled}} \quad S_{pooled} = \sqrt{\frac{(n_t - 1)s_t^2 + (n_c - 1)s_c^2}{n_t + n_c - 2}} \quad g = \left(1 - \frac{3}{4(n_t + n_c) - 9}\right)d$$

Additionally, each  $g$  and the corresponding standard error was corrected for bias due to unreliability of measurement according to the methods of Hunter and Schmidt (2) using Excel

2003 (Microsoft Corporation, Redmond, WA). This correction is considered more conservative when performing moderator analysis since the confidence intervals for each effect size are increased to account for the error inherent in the original measures.

$$g' = \frac{g}{\sqrt{a}} \quad SE_{g'} = \frac{SE_g}{\sqrt{a}}$$

For self-report measures, the test-retest reliability was used as the coefficient of measurement error (shown as  $a$ , above). For clinician-rated measures, the interrater reliability was used as the coefficient of measurement error. Coefficients were taken from the original validation publications from each measure. When not available in the original validation publication, systematic reviews of the measure were consulted. The following coefficients were used: BDI  $r = .93$  (3); BSI-D  $r = .84$  (4); CES-D  $r = .59$  (5); D-30  $r = .90$  (6); GDS  $r = .94$  (7); HRSD  $ICC = .84$  (8); MADRS  $r = .94$  (9); MMPI-D  $r = .75$  (10); SCL-90-D  $r = .79$  (11); SDS  $r = .87$  (12).

When more than one measure of depression was present for a given comparison within a given study (e.g., both the BDI and the HRSD),  $g$  was generated and corrected for each depression measure, then the multiple  $g$ 's were put back into Comprehensive Meta-analysis 2.0 where the effect sizes were averaged and their standard errors were combined, making one effect size per comparison. This software automatically assumes an intercorrelation between measures of  $r = 1.0$  when combining standard errors, as this is the most conservative assumption in that it does not reduce the size of the confidence interval, and thus is more conservative in the context of moderator analysis. When insufficient data were provided in the publication to extract an effect size, other publications related to the same trial were checked, and failing this, study authors were contacted.

## **Secondary Analyses Involving Reliability and Intercorrelation of Depression Measures**

While the Hunter and Schmidt corrections account for unreliability of measurement in the effect sizes, we also wanted to see whether reliability of instruments may have had a systematic relationship to quality score. We examined the correlation between quality score and number of depression instruments used in a given study (range 1 to 3), as well as the correlation between quality score and the reliability of the instruments (range .59 to .94), taking the average reliability when more than one measure was used. The latter test was also re-run using the highest reliability of instruments in a given study, and lowest reliability of instruments in a given study. All correlations were small and nonsignificant. This supports the inference that the relationship between quality and increased variability of outcome was not simply due to lower reliability of instruments in lower quality studies.

In regards to intercorrelation of depression measures, which was relevant when more than one measure was used in a given study, we approached this two different ways. As stated above, in the primary analysis, when effect sizes and standard errors were combined, we used the conservative estimate of  $r = 1.0$ . In a secondary analysis we also tried using an estimate of average intercorrelation between depression measures of  $r = .75$ , based on the review by Beck et al. (13), and using the formulas provided by Borenstein et al. (14), p. 228. The results of the meta-regression analyses were the same.

## **Analyses of Additional Study Characteristics**

In addition to the regression models discussed in the published article, additional regression models were run with the additional study characteristics that were coded, to test

whether the quality score remained significant while controlling for these other study characteristics. Continuous characteristics included number of sessions and severity at baseline. Severity at baseline was calculated by transforming the pretreatment depression scores into *Z* scores based on normative data for depressed populations from the validation studies for each of the depression measures, thus making the baseline measures comparable across studies. One depression measure was chosen for each study according to the following hierarchy: BDI, HRSD, other. The BDI was used for 82 studies and the HRSD was used for 11 studies. Categorical characteristics (dummy coded) included individual vs. group (with three levels: CBT individual treatment compared to a group treatment, CBT group compared to an individual treatment, and both CBT and its comparator the same), recruitment method (with four levels: community, clinical, systematic screening, and other), type of outcome instrument (with three levels: self-report only, rating scale only, or self report + rating scale), and whether the CBT treatment cited as its manual the original manual by Beck (15) with two levels: “yes” or “no”. The RCTs were also coded as to whether they completed a full intent-to-treat analysis. This dichotomized the item on the RCT-PQRS that rated ITT analysis, by keeping ratings at a level of 2 as a “yes” and ratings at a level of 0 or 1 as a “no.” Although ITT is included in the RCT-PQRS, it was thought that this characteristic could make a large difference in effect size, and thus should be tested on its own as well.

Reliability was demonstrated for these study characteristics by having one author familiar with meta-analytic methods (A.R.E.) extract this data from 24 randomly selected studies. The *ICC* was calculated for continuous variables and Cohen’s  $\kappa$  for categorical variables. The *ICC* was .96, and .70 for number of sessions, and severity at baseline, respectively. Cohen’s  $\kappa$  was 1.00, .84, .79, .70 and .58 for type of outcome instrument, recruitment type, use of the Beck

manual, group vs. individual treatment, and use of full intent-to-treat analysis, respectively.

These numbers can be considered to be in the adequate to excellent range (16). All data used in the analysis were those which were extracted by the first author.

Random effects meta-regression was performed with the *metareg* macro (17) for Stata 10.0 (StataCorp LP, College Station, TX) with effect size as the outcome variable and quality score, comparison type, and the above additional study characteristics as predictors. The full model was reduced by stepwise backward entry (by hand) removing the least significant predictor in each step while still controlling for comparison type. This was done for the full set of 153 effect sizes as well as the set of 96 effect sizes in which only one effect size was allowed per each of the 96 RCTs, chosen according to an *a priori* hierarchy. When there was more than one comparator in a given RCT, one comparator was chosen according to the following order of priority: wait list; medication; bona fide psychotherapy; TAU/attention placebo/pill placebo. The hierarchy was chosen based on what we thought to be the greatest replicability and stability of treatment in the comparator.

None of the study characteristics besides quality remained significant while controlling for comparator type, in either the model with 96 observations or the model with 153 observations. These analyses supported the influence of quality on outcome and helped to rule out a larger influence due to the other study characteristics, adding robustness to our findings.

### **References for Online Supplementary Methods and Analyses**

- (1) Hedges LV, Olkin I. Statistical methods for meta-analysis. Orlando: Academic Press; 1985.
- (2) Hunter JE, Schmidt FL. Methods of meta-analysis: Correcting error bias in research findings. 2nd ed. Thousand Oaks, CA: Sage Publications, Inc; 2004.
- (3) Beck AT, Steer RA, Brown GK. Manual for the Beck Depression Inventory II. San Antonio TX: Psychological Corporation; 1996.

- (4) Derogatis LR. Brief Symptom Inventory (BSI) administration, score, and procedures manual. 3rd ed. Minneapolis MN: National Computer Systems; 1993.
- (5) Radloff LS. The CES-D Scale: A self-report depression scale for research in the general population. *Appl Psychol Meas* 1977;1(3):385-401.
- (6) Dempsey P. A unidimensional depression scale for the MMPI. *J Consult Psychol* 1964 08;28(4):364-370.
- (7) Leshner EL. Validation of the Geriatric Depression Scale among nursing home residents. *Clin Gerontol* 1986 04;4(4):21-28.
- (8) Bagby RM, Ryder AG, Schuller DR, Marshall MB. The Hamilton Depression Rating Scale: Has the Gold Standard Become a Lead Weight? *Am J Psychiatry* 2004 12;161(12):2163-2177.
- (9) Montgomery SA, Åsberg M. A new depression scale designed to be sensitive to change. *BJP* 1979 04;134:382-389.
- (10) Butcher JN, Dahlstrom WG, Graham JR, Tellegren A, Kaemmer B. Minnesota Multiphasic Personality Inventory-2 (MMPI-2): Manual for administration and scoring. Minneapolis, MN: University of Minnesota Press; 1989.
- (11) Derogatis LR. Symptom Checklist-90-R administration, score, and procedures manual. 3rd ed. Minneapolis MN: National Computer Systems; 1994.
- (12) Tanaka-Matsumi J, Kameoka VA. Reliabilities and concurrent validities of popular self-report measures of depression, anxiety, and social desirability. *J Consult Clin Psychol* 1986 06;54(3):328-333.
- (13) Beck, AT, Steer, RA, Garbin, MG. Psychometric properties of the beck depression inventory: Twenty-five years of evaluation. *Clin Psych Rev* 1988; 8: 77-100.
- (14) Borenstein, M, Hedges, LV, Higgins, JPT, Rothstein, HR. Introduction to meta-analysis. Chichester, UK: Wiley; 2009.
- (15) Beck AT, Rush AJ, Shaw BF, Emery G. Cognitive therapy of depression. New York: Guilford Press; 1979.
- (16) Fleiss JL, Levin B, Paik MC. Statistical methods for rates and proportions. 2nd ed. New York: Wiley; 1981.
- (17) Harbord RM, Higgins JPT. Meta-regression in Stata. *Stata J* 2008;8(4):493-519.

**Table 1. Study characteristics, effect sizes, and quality scores for CBT RCTs included in the meta-regression.**

| Trial Name             | Treatment                                                    | Comp Type | ES    | 95% CI Limit |       | n  | Format | Outcomes  | Sessions | Recruitment Method | Baseline |     | Beck   |    | Quality Score |
|------------------------|--------------------------------------------------------------|-----------|-------|--------------|-------|----|--------|-----------|----------|--------------------|----------|-----|--------|----|---------------|
|                        |                                                              |           |       | Lower        | Upper |    |        |           |          |                    | Severity | ITT | Manual |    |               |
| Allart-van Dam 2003    | Grp CBT vs.                                                  | 2         | 0.59  | 0.18         | 1.01  | 61 | Grp    | BDI       | 13       | Community          | -0.36    | No  | No     | 33 |               |
|                        | Assessment & Advise                                          |           |       |              |       | 41 | Ind    |           |          |                    |          |     |        |    |               |
| Areal 2005             | Grp CBT vs.                                                  | 2         | -0.14 | -0.85        | 0.58  | 13 | Grp    | HRSD      | 18       | Community          | -1.29    | No  | No     | 33 |               |
|                        | Clinical Case Management                                     |           |       |              |       | 26 | Ind    |           |          |                    |          |     |        |    |               |
| Barker 1987*           | Clin Case Mgmt + CBT <sup>†</sup>                            | 3         | 0.02  | -0.75        | 0.79  | 17 | Grp    |           | 15       | Clinical           | 1.37     | No  | No     | 8  |               |
|                        | CBT + 5HT-cocktail vs. 5HT-cocktail                          | 5         | NA    | NA           | NA    | NA | Ind    | BDI, HRSD |          |                    |          |     |        |    |               |
| Baker 2010             | CBT vs. Brief Motivational Interviewing                      | 2         | -0.09 | -0.43        | 0.25  | 61 | Ind    |           | 10       | Community          | 0.68     | No  | No     | 22 |               |
|                        | I-CBT <sup>†</sup>                                           | 3         | -0.08 | -0.42        | 0.25  | 63 | Ind    |           |          |                    |          |     |        |    |               |
|                        | I-CBT for Alcohol Abuse <sup>†</sup>                         | 3         | 0.06  | -0.28        | 0.41  | 51 | Ind    |           |          |                    |          |     |        |    |               |
|                        |                                                              |           |       |              |       | 71 | Ind    | BDI       |          |                    |          |     |        |    |               |
| Barkham 1996*          | CBT (16 sessions) vs. Psychodynamic-Interpersonal (16 sess.) | 3         | NA    | NA           | NA    | 9  | Ind    |           | 16/8     | Sys. Scrn.         | 0.22     | No  | Yes    | 27 |               |
|                        | Psychodynamic-Interpersonal (8 sess.)                        | 3         | NA    | NA           | NA    | 9  | Ind    |           |          |                    |          |     |        |    |               |
|                        | CBT (8 sess.) <sup>†</sup>                                   | 3         | NA    | NA           | NA    | 9  | Ind    |           |          |                    |          |     |        |    |               |
|                        |                                                              |           |       |              |       | 9  | Ind    | BDI       |          |                    |          |     |        |    |               |
| Barkham 1999           | CBT vs. PDT                                                  | 3         | 0.18  | -0.20        | 0.56  | 54 | Ind    | BDI       | 3        | Community          | -0.77    | No  | Yes    | 28 |               |
| Beach 1992             | CBT vs. Wait List                                            | 1         | 1.04  | 0.27         | 1.81  | 15 | Ind    | BDI       | 20       | Community          | 0.83     | No  | Yes    | 28 |               |
|                        | Behavioral Marital Tx <sup>‡</sup>                           | 3         | -0.36 | -1.08        | 0.37  | 15 | Cpl    |           |          |                    |          |     |        |    |               |
| Beck 1985 <sup>§</sup> | CBT vs. CBT + Amitryptaline <sup>†</sup>                     | 6         | 0.02  | -0.81        | 0.85  | 11 | Ind    | BDI, HRSD | 20       | Clinical           | 1.02     | No  | Yes    | 22 |               |
|                        |                                                              |           |       |              |       | 14 | Ind    |           |          |                    |          |     |        |    |               |
| Beutler 1987           | Grp CBT vs. Support Grp + Placebo                            | 2         | 0.42  | -0.32        | 1.15  | 15 | Grp    | BDI, HRSD | 20       | Sys. Scrn.         | -0.62    | No  | Yes    | 29 |               |
|                        | Support Grp + Alprazolam                                     | 4         | 0.12  | -0.65        | 0.90  | 12 | Grp    |           |          |                    |          |     |        |    |               |
|                        | CBT+Supp. Grp+Alprazolam                                     | 6         | 0.27  | -0.49        | 1.03  | 13 | Grp    |           |          |                    |          |     |        |    |               |
|                        |                                                              |           |       |              |       | 16 | Grp    | BDI, HRSD |          |                    |          |     |        |    |               |
| Beutler 1991           | Grp CBT vs. Focused-Expressive Px                            | 3         | 0.14  | -0.49        | 0.76  | 22 | Grp    | BDI, HRSD | 20       | Community          | 0.64     | Yes | Yes    | 37 |               |
|                        | Supportive Therapy                                           | 2         | 0.16  | -0.48        | 0.81  | 20 | Grp    |           |          |                    | 0.64     |     |        |    |               |
| Blackburn 1981*        | CBT vs. Antidepressants                                      | 4         | NA    | NA           | NA    | 20 | Ind    | BDI, HRSD | 23       | Other              | -0.69    | No  | Yes    | 22 |               |
|                        |                                                              |           |       |              |       | 22 | Ind    |           |          |                    |          |     |        |    |               |

|                 |                                    |   |       |       |       |     |     |            |    |            |       |     |     |    |
|-----------------|------------------------------------|---|-------|-------|-------|-----|-----|------------|----|------------|-------|-----|-----|----|
| Blackburn 1997  | CBT + Antidepressants              | 6 | NA    | NA    | NA    | 22  | Ind | BDI, HRSD  | 28 | Clinical   | 0.84  | No  | Yes | 28 |
|                 | CBT vs.                            |   |       |       |       | 24  | Ind |            |    |            |       |     |     |    |
|                 | Antidepressants                    | 4 | 0.10  | -0.50 | 0.70  | 23  | Ind |            |    |            |       |     |     |    |
| Bodenmann 2008  | Antidepressants                    | 4 | 0.34  | -0.28 | 0.97  | 20  | Ind | BDI, HRSD  | 20 | Community  | 0.28  | No  | Yes | 29 |
|                 | CBT vs.                            |   |       |       |       | 20  | Ind |            |    |            |       |     |     |    |
|                 | IPT                                | 3 | 0.01  | -0.66 | 0.69  | 20  | Ind |            |    |            |       |     |     |    |
| Bolton 2001*    | Coping Couples Therapy             | 3 | -0.02 | -0.68 | 0.65  | 20  | Cpl | HADS       | 10 | Sys. Scrn. | 0.42  | No  | No  | 5  |
|                 | CBT vs.                            |   |       |       |       | NA  | Ind |            |    |            |       |     |     |    |
| Bowers 1990     | General Practitioner TAU           | 2 | NA    | NA    | NA    | NA  | Ind | BDI, HRSD  | 12 | Clinical   | 0.78  | No  | Yes | 19 |
|                 | CBT + Nortryptaline                |   |       |       |       | 10  | Ind |            |    |            |       |     |     |    |
| Bright 1999     | Nortryptaline                      | 5 | 0.90  | -0.05 | 1.84  | 10  | Ind | BDI, HRSD  | 10 | Community  | 0.29  | No  | Yes | 35 |
|                 | Nortryptaline + Relaxation         | 4 | 0.10  | -0.80 | 0.99  | 10  | Ind |            |    |            |       |     |     |    |
|                 | PDT                                | 3 | 0.04  | -0.49 | 0.57  | 30  | Ind |            |    |            |       |     |     |    |
|                 | Grp CBT vs.                        |   |       |       |       | 18  | Grp |            |    |            |       |     |     |    |
|                 | Support Grp                        | 2 | 0.18  | -0.47 | 0.83  | 22  | Grp |            |    |            |       |     |     |    |
| Brown 1984      | Nonprof. Support Grp               | 2 | -0.26 | -0.99 | 0.47  | 14  | Grp | BDI, CES-D | 12 | Community  | 1.29  | No  | No  | 21 |
|                 | Nonprof. CBT Grp                   | 2 | 0.15  | -0.60 | 0.89  | 13  | Grp |            |    |            |       |     |     |    |
|                 | CBT vs.                            |   |       |       |       | 13  | Ind |            |    |            |       |     |     |    |
|                 | Wait List                          | 1 | 0.39  | -0.53 | 1.30  | 11  | Ind |            |    |            |       |     |     |    |
| Brown 1997      | Grp CBT <sup>†</sup>               | 3 | -0.14 | -0.92 | 0.63  | 25  | Grp | BDI, HRSD  | 8  | Clinical   | 0.07  | No  | No  | 26 |
|                 | Phone Contact                      | 2 | -0.12 | -0.99 | 0.74  | 15  | Ind |            |    |            |       |     |     |    |
| Comas-Diaz 1981 | CBT vs.                            |   |       |       |       | 19  | Ind | BDI, HRSD  | 5  | Community  | 0.89  | No  | Yes | 10 |
|                 | Relaxation Training                | 2 | 0.57  | -0.14 | 1.29  | 15  | Ind |            |    |            |       |     |     |    |
| Covi 1987*      | Grp CBT vs.                        |   |       |       |       | 8   | Grp | BDI, HRSD  | 15 | Community  | -0.73 | No  | Yes | 25 |
|                 | Wait List                          | 1 | 1.81  | 0.70  | 2.93  | 10  | Ind |            |    |            |       |     |     |    |
| David 2008      | Grp CBT vs.                        |   |       |       |       | 27  | Grp | BDI, HRSD  | 20 | Clinical   | 1.00  | Yes | Yes | 42 |
|                 | Insight-oriented Grp Therapy       | 2 | NA    | NA    | NA    | 20  | Grp |            |    |            |       |     |     |    |
|                 | Grp CBT + Imipramine               | 6 | NA    | NA    | NA    | 23  | Grp |            |    |            |       |     |     |    |
| DeBerry 1989    | CBT vs.                            |   |       |       |       | 56  | Ind | BDI        | 20 | Other      | -0.36 | No  | No  | 15 |
|                 | Fluoxetine                         | 4 | 0.05  | -0.34 | 0.44  | 57  | Ind |            |    |            |       |     |     |    |
|                 | REBT <sup>†</sup>                  | 3 | 0.01  | -0.38 | 0.40  | 57  | Ind |            |    |            |       |     |     |    |
| DeRubeis 2005   | Grp CBT vs.                        |   |       |       |       | 10  | Grp | HRSD       | 20 | Community  | 0.06  | Yes | Yes | 43 |
|                 | Relaxation Training                | 3 | -0.82 | -1.68 | 0.03  | 13  | Grp |            |    |            |       |     |     |    |
| Dimidjian 2006  | Attention Placebo                  | 2 | 0.69  | -0.22 | 1.61  | 9   | Grp | BDI, HRSD  | 10 | Community  | 0.75  | No  | Yes | 44 |
|                 | CBT vs.                            |   |       |       |       | 60  | Ind |            |    |            |       |     |     |    |
| Dowrick 2000    | Paroxetine                         | 4 | -0.51 | -0.85 | -0.17 | 120 | Ind | BDI        | 8  | Sys. Scrn. | 0.31  | Yes | No  | 29 |
|                 | CBT vs.                            |   |       |       |       | 44  | Ind |            |    |            |       |     |     |    |
|                 | Behavioral Activation <sup>‡</sup> | 3 | -0.27 | -0.79 | 0.25  | 40  | Ind |            |    |            |       |     |     |    |



|                             |                                            |   |       |       |      |     |     |                |    |            |       |     |     |  |    |  |
|-----------------------------|--------------------------------------------|---|-------|-------|------|-----|-----|----------------|----|------------|-------|-----|-----|--|----|--|
|                             | Wait List                                  | 1 | 0.07  | -0.21 | 0.36 | 139 | Ind |                |    |            |       |     |     |  |    |  |
|                             | Problem-Solving treatment <sup>†</sup>     | 3 | -0.19 | -0.49 | 0.12 | 98  | Ind |                |    |            |       |     |     |  |    |  |
| Dozois 2009                 | CBT + Antidepressants                      |   |       |       |      | 21  | Ind | BDI, HRSD      | 15 | Clinical   | 0.54  | No  | Yes |  | 28 |  |
|                             | Antidepressants                            | 5 | 0.37  | -0.27 | 1.01 | 21  | Ind |                |    |            |       |     |     |  |    |  |
| Drapkin 2008*               | Grp CBT vs. 12-Step Facilitation           | 2 | NA    | NA    | NA   | NA  | Grp | HRSD           | 24 | Clinical   | NA    | No  | No  |  | 26 |  |
| Echeburua 2006 <sup>§</sup> | Grp CBT vs. Grp CBT + Pharma <sup>†</sup>  | 6 | 0.68  | 0.06  | 1.30 | 24  | Grp | BDI, HRSD      | 12 | Sys. Scrn. | 0.27  | No  | No  |  | 18 |  |
| Elkin 1989                  | CBT vs. Imipramine                         | 4 | -0.14 | -0.53 | 0.24 | 59  | Ind | BDI, HRSD      | 20 | Clinical   | 0.70  | Yes | Yes |  | 38 |  |
|                             | IPT                                        | 3 | -0.12 | -0.50 | 0.26 | 61  | Ind |                |    |            |       |     |     |  |    |  |
|                             | Placebo + Clin Mgmt                        | 2 | 0.26  | -0.12 | 0.64 | 62  | Ind |                |    |            |       |     |     |  |    |  |
| Emanuels-Zuurveen 1996      | CBT vs. Behavioral Marital Tx <sup>‡</sup> | 3 | -0.31 | -1.07 | 0.46 | 14  | Ind | BDI            | 16 | Community  | 0.29  | No  | Yes |  | 26 |  |
|                             |                                            |   |       |       |      | 13  | Cpl |                |    |            |       |     |     |  |    |  |
| Emanuels-Zuurveen 1997      | CBT vs. Spouse-Aided Therapy Grp           | 3 | 0.29  | -0.54 | 1.12 | 10  | Ind | BDI            | 16 | Community  | 0.40  | No  | Yes |  | 26 |  |
|                             | CBT+Antidepressants vs. Antidepressants    | 5 | 2.56  | 1.70  | 3.43 | 19  | Grp | BDI            | 12 | Clinical   | 0.72  | Yes | Yes |  | 9  |  |
| Faramarzi 2008              | Grp CBT vs. Wait List                      | 1 | 1.79  | 1.17  | 2.40 | 29  | Grp | BDI            | 10 | Sys. Scrn. | 0.09  | No  | Yes |  | 29 |  |
|                             | Fluoxetine                                 | 4 | 0.97  | 0.42  | 1.53 | 20  | Ind |                |    |            |       |     |     |  |    |  |
| Fleming 1980*               | Grp CBT vs. Behavioral Grp Therapy         | 3 | NA    | NA    | NA   | 13  | Grp | BDI, D-30      | 8  | Community  | 0.43  | No  | No  |  | 11 |  |
|                             | Non-directive Grp Therapy                  | 2 | NA    | NA    | NA   | 9   | Grp |                |    |            |       |     |     |  |    |  |
| Floyd 2004                  | CBT vs. Bibliotherapy                      | 2 | -0.12 | -0.86 | 0.62 | 16  | Ind | HDRS           | 20 | Community  | -1.09 | Yes | Yes |  | 32 |  |
| Foster 2007*                | Grp CBT vs. Supportive/Exploratory Grp     | 2 | NA    | NA    | NA   | NA  | Grp | BDI, CES-D     | 16 | Clinical   | 0.78  | Yes | No  |  | 23 |  |
| Fremont 1987                | CBT vs. Exercise                           | 2 | -0.28 | -0.99 | 0.44 | 16  | Ind | BDI            | 10 | Community  | -0.08 | No  | No  |  | 17 |  |
|                             | CBT + Exercise <sup>†</sup>                | 3 | 0.23  | -0.45 | 0.92 | 15  | Grp |                |    |            | -0.08 |     |     |  |    |  |
| Fry 1984                    | CBT vs. Wait List                          | 1 | 0.50  | -0.34 | 1.35 | 16  | Ind | MMPI-D         | 12 | Sys. Scrn. | -0.31 | No  | No  |  | 24 |  |
|                             |                                            |   |       |       |      | 12  | Ind |                |    |            |       |     |     |  |    |  |
| Gallagher 1982              | CBT vs. Behavior Therapy <sup>‡</sup>      | 3 | 0.19  | -0.71 | 1.09 | 10  | Ind | BDI, HRSD, SDS | 16 | Community  | 0.66  | No  | Yes |  | 28 |  |
|                             |                                            |   |       |       |      | 10  | Ind |                |    |            |       |     |     |  |    |  |

|                         |                                            |   |       |       |       |     |     |                   |    |           |       |     |     |    |  |
|-------------------------|--------------------------------------------|---|-------|-------|-------|-----|-----|-------------------|----|-----------|-------|-----|-----|----|--|
|                         | Brief Relational Therapy                   | 3 | 0.70  | -0.23 | 1.62  | 10  | Ind |                   |    |           |       |     |     |    |  |
| Gallagher-Thompson 1994 | CBT vs. PDT                                | 3 | 0.40  | -0.12 | 0.91  | 30  | Ind | BDI, HRSD, GDS    | 20 | Clinical  | 0.03  | No  | Yes | 29 |  |
| Gardner 1981*           | CBT vs. Behavior Therapy                   | 3 | NA    | NA    | NA    | 8   | Ind | BDI, SDS          | 6  | Community | 0.45  | No  | No  | 12 |  |
| Hamdan-Mansour 2009     | Grp CBT vs. Wait List                      | 1 | 0.67  | 0.21  | 1.14  | 44  | Grp | BDI               | 10 | Screening | 0.17  | No  | No  | 16 |  |
| Haringsma 2006          | Grp CBT vs. Wait List                      | 1 | 0.62  | 0.13  | 1.11  | 52  | Grp | CES-D             | 10 | Community | 0.03  | No  | No  | 35 |  |
| Hegerl 2010             | Grp CBT vs. Sertraline                     | 4 | 0.01  | -0.41 | 0.44  | 61  | Grp | HRSD, IDS         | 10 | Screening | -1.16 | No  | Yes | 39 |  |
|                         | Guided Self Help                           | 2 | 0.61  | 0.12  | 1.10  | 83  | Ind |                   |    |           |       |     |     |    |  |
|                         | Placebo                                    | 2 | 0.42  | 0.00  | 0.85  | 59  | Grp |                   |    |           |       |     |     |    |  |
| Hogg 1988               | Grp CBT vs. Process Group                  | 3 | -0.20 | -1.00 | 0.61  | 13  | Grp | BDI, MMPI-D       | 8  | Clinical  | 0.16  | No  | Yes | 23 |  |
|                         | Wait List (dif time frame)                 | 1 | 0.71  | -0.18 | 1.61  | 14  | Grp |                   |    |           |       |     |     |    |  |
|                         |                                            |   |       |       |       | 10  | Ind |                   |    |           |       |     |     |    |  |
| Hollon 1992             | CBT vs. Imipramine                         | 4 | 0.08  | -0.44 | 0.60  | 25  | Ind | BDI, HRSD, MMPI-D | 20 | Clinical  | 1.00  | Yes | Yes | 39 |  |
|                         | CBT + Imipramine <sup>†</sup>              | 6 | -0.34 | -0.95 | 0.28  | 57  | Ind |                   |    |           |       |     |     |    |  |
| Jacobson 1991           | CBT vs. Behavioral Marital Tx <sup>†</sup> | 3 | 0.70  | 0.02  | 1.37  | 20  | Ind | BDI, HRSD         | 20 | Community | 0.67  | No  | Yes | 35 |  |
|                         | CBT + Behavioral Marital Tx <sup>†</sup>   | 3 | 0.27  | -0.37 | 0.91  | 19  | Cpl |                   |    |           |       |     |     |    |  |
| Jacobson 1996           | CBT vs. Behavioral Activation <sup>†</sup> | 3 | -0.13 | -0.54 | 0.27  | 50  | Ind | BDI, HRSD         | 20 | Community | 0.92  | Yes | Yes | 38 |  |
|                         | Behav. Act.+Auto Thoughts <sup>†</sup>     | 3 | 0.00  | -0.44 | 0.44  | 56  | Ind |                   |    |           |       |     |     |    |  |
| Jarrett 1999            | CBT vs. Phenzelzine                        | 4 | -0.23 | -0.72 | 0.26  | 43  | Ind | BDI, HRSD         | 20 | Community | 0.57  | Yes | Yes | 40 |  |
|                         | Placebo                                    | 2 | 0.62  | 0.12  | 1.11  | 36  | Ind |                   |    |           |       |     |     |    |  |
| Kay-Lambkin 2009        | CBT vs. Computer CBT                       | 2 | 0.36  | -0.24 | 0.97  | 22  | Ind | BDI               | 10 | Community | 0.78  | Yes | No  | 25 |  |
|                         | Brief Intervention                         | 2 | 0.96  | 0.33  | 1.60  | 22  | Ind |                   |    |           |       |     |     |    |  |
| Keller 2000             | CBT vs. Nefazodone                         | 4 | -0.05 | -0.26 | 0.15  | 216 | Ind | HRSD              | 16 | Clinical  | -0.71 | No  | No  | 40 |  |
|                         | CBT + Nefazodone <sup>†</sup>              | 6 | -0.70 | -0.91 | -0.49 | 220 | Ind |                   |    |           |       |     |     |    |  |
|                         |                                            |   |       |       |       | 226 | Ind |                   |    |           |       |     |     |    |  |
| Kim 2009*               | Grp CBT vs. Grp CBT in the Forest          | 3 | NA    | NA    | NA    | 19  | Grp | BDI, HRSD, MADRS  | 4  | Other     | -1.18 | No  | No  | 17 |  |
|                         | TAU                                        | 2 | NA    | NA    | NA    | 23  | Grp |                   |    |           |       |     |     |    |  |
|                         |                                            |   |       |       |       | 21  | Ind |                   |    |           |       |     |     |    |  |

|                |                                       |   |       |       |      |     |     |                  |    |            |       |     |     |    |
|----------------|---------------------------------------|---|-------|-------|------|-----|-----|------------------|----|------------|-------|-----|-----|----|
| King 2000      | CBT vs.                               |   |       |       |      | 134 | Ind | BDI              | 12 | Sys. Scrn. | 0.77  | Yes | No  | 39 |
|                | Rogerian Counseling                   | 3 | 0.03  | -0.22 | 0.28 | 126 | Ind |                  |    |            |       |     |     |    |
|                | TAU/Routine GP Care                   | 2 | -0.04 | -0.34 | 0.27 | 67  | Ind |                  |    |            |       |     |     |    |
| Kocsis 2009    | CBT + Pharma Algorithm vs.            |   |       |       |      | 200 | Ind | HRSD             | 16 | Community  | 1.06  | No  | No  | 43 |
|                | Pharma Algorithm                      | 5 | 0.13  | -0.16 | 0.42 | 96  | Ind |                  |    |            |       |     |     |    |
|                | Supportive Therapy + Pharma Algorithm | 2 | 0.19  | -0.04 | 0.42 | 195 | Ind |                  |    |            |       |     |     |    |
| Laidlaw 2008   | CBT vs.                               |   |       |       |      | 20  | Ind | BDI, HRSD, GDS   | 8  | Screening  | -0.18 | Yes | Yes | 28 |
|                | TAU                                   | 2 | 0.44  | -0.21 | 1.10 | 20  | Ind |                  |    |            |       |     |     |    |
| LaPointe 1980* | Grp CBT vs.                           |   |       |       |      | 12  | Grp | BDI              | 6  | Community  | 0.39  | No  | No  | 14 |
|                | Assertiveness Training Grp            | 3 | NA    | NA    | NA   | 10  | Grp |                  |    |            |       |     |     |    |
|                | Insight Grp                           | 3 | NA    | NA    | NA   | 11  | Grp |                  |    |            |       |     |     |    |
| Luty 2007      | CBT vs.                               |   |       |       |      | 86  | Ind | BDI, HRSD, MADRS | 16 | Clinical   | 0.82  | Yes | Yes | 39 |
|                | IPT                                   | 3 | 0.22  | -0.09 | 0.53 | 91  | Ind |                  |    |            |       |     |     |    |
| Maynard 1993   | Grp CBT vs.                           |   |       |       |      | 10  | Grp | BDI              | 12 | Community  | -0.23 | No  | No  | 10 |
|                | Wait List                             | 1 | 0.70  | -0.14 | 1.54 | 14  | Ind |                  |    |            |       |     |     |    |
|                | Support Grp                           | 2 | 1.22  | 0.14  | 2.29 | 6   | Grp |                  |    |            |       |     |     |    |
| McBride 2006   | CBT vs.                               |   |       |       |      | 28  | Ind | BDI, HRSD        | 20 | Community  | 0.60  | No  | No  | 24 |
|                | IPT                                   | 3 | 0.47  | -0.09 | 1.03 | 27  | Ind |                  |    |            |       |     |     |    |
| McCabe 2006    | Grp CBT vs.                           |   |       |       |      | 34  | Grp | BDI              | 5  | Community  | -0.61 | No  | No  | 17 |
|                | Wait List                             | 1 | 1.63  | 0.93  | 2.32 | 15  | Ind |                  |    |            |       |     |     |    |
| McKnight 1992  | CBT vs.                               |   |       |       |      | 22  | Ind | BDI              | 8  | Community  | 0.97  | No  | Yes | 31 |
| McNamara 1986  | Tricyclic Antidepressants             | 4 | -0.31 | -0.96 | 0.33 | 21  | Ind | BDI              | 8  | Clinical   | 0.57  | No  | Yes | 19 |
|                | CBT vs.                               |   |       |       |      | 10  | Ind |                  |    |            |       |     |     |    |
|                | Behavior Therapy <sup>‡</sup>         | 3 | -0.26 | -1.13 | 0.62 | 10  | Ind |                  |    |            |       |     |     |    |
|                | Combined CT & BT <sup>†</sup>         | 3 | -0.44 | -1.32 | 0.44 | 10  | Ind |                  |    |            |       |     |     |    |
| Miller 1989    | Client Centered/Attn                  | 2 | 0.63  | -0.27 | 1.52 | 10  | Ind | BDI, HRSD        | 10 | Clinical   | 0.82  | Yes | Yes | 31 |
|                | Placebo                               |   |       |       |      |     |     |                  |    |            |       |     |     |    |
|                | CBT + TAU vs.                         |   |       |       |      | 14  | Ind |                  |    |            |       |     |     |    |
|                | Social Skills + TAU <sup>‡</sup>      | 3 | -0.45 | -1.20 | 0.31 | 17  | Ind |                  |    |            |       |     |     |    |
| Miller 2005*   | TAU                                   | 2 | 0.52  | -0.20 | 1.25 | 14  | Ind | BDI, HRSD        | 24 | Clinical   | 1.44  | Yes | Yes | 32 |
|                | CBT + Antidepressants vs.             |   |       |       |      | NA  | Ind |                  |    |            |       |     |     |    |
|                | Antidepressants                       | 5 | NA    | NA    | NA   | NA  | Ind |                  |    |            |       |     |     |    |
|                | Antidepressants+ Family Therapy       | 6 | NA    | NA    | NA   | NA  | Fam |                  |    |            |       |     |     |    |
|                | Antidepressants+Fam Ther+CBT          | 6 | NA    | NA    | NA   | NA  | Fam |                  |    |            |       |     |     |    |
| Miranda 1994*  | Grp CBT vs.                           |   |       |       |      | 72  | Grp | BDI              | 8  | Sys. Scrn. | NA    | No  | No  | 26 |
|                | Wait List                             | 1 | NA    | NA    | NA   | 78  | Ind |                  |    |            |       |     |     |    |

|                            |                                                 |   |       |       |       |    |     |                              |    |            |       |     |     |    |
|----------------------------|-------------------------------------------------|---|-------|-------|-------|----|-----|------------------------------|----|------------|-------|-----|-----|----|
| Miranda 2003a              | Grp CBT vs.<br>SSRI                             | 4 | -0.32 | -0.64 | 0.00  | 88 | Grp | HRSD                         | 8  | Sys. Scrn. | -1.00 | Yes | No  | 34 |
|                            | TAU                                             | 2 | 0.22  | -0.10 | 0.54  | 89 | Ind |                              |    |            |       |     |     |    |
| Miranda 2003b*             | Grp CBT vs.<br>Grp CBT + Clinical<br>Management | 3 | NA    | NA    | NA    | 96 | Grp | BDI                          | 12 | Clinical   | 0.80  | Yes | No  | 28 |
| Moak 2003 <sup>§</sup>     | CBT vs.<br>CBT + Sertraline <sup>†</sup>        | 6 | -0.19 | -0.65 | 0.27  | 44 | Ind | BDI, HRSD                    | 12 | Clinical   | 0.36  | Yes | No  | 31 |
| Murphy 1984                | CBT vs.<br>Tricyclic Antidepressants            | 4 | 0.33  | -0.26 | 0.93  | 24 | Ind | BDI, HRSD                    | 20 | Clinical   | 0.83  | Yes | Yes | 30 |
|                            | CBT + Tricyclics <sup>†</sup>                   | 6 | 0.00  | -0.61 | 0.60  | 22 | Ind |                              |    |            |       |     |     |    |
|                            | CBT + Placebo <sup>†</sup>                      | 3 | -0.33 | -0.99 | 0.32  | 17 | Ind |                              |    |            |       |     |     |    |
| Murphy 1995                | CBT vs.<br>Desipramine                          | 4 | 1.40  | 0.42  | 2.37  | 10 | Ind | BDI                          | 20 | Community  | 0.55  | Yes | Yes | 34 |
|                            | Relaxation Training                             | 2 | 0.15  | -0.68 | 0.98  | 13 | Ind |                              |    |            |       |     |     |    |
| Neimeyer 1990 <sup>§</sup> | Grp CBT vs.<br>Grp CBT no HW <sup>†</sup>       | 3 | 0.35  | -0.19 | 0.88  | 30 | Grp | BDI, HRSD                    | 10 | Community  | 0.45  | No  | Yes | 20 |
| Nezu 1989                  | Grp CBT vs.<br>Wait List                        | 1 | 3.03  | 1.86  | 4.20  | 11 | Ind | BDI, HRSD                    | 10 | Community  | 0.68  | No  | No  | 27 |
|                            | Abbreviated Problem<br>Solving                  | 2 | 1.31  | 0.47  | 2.15  | 14 | Grp |                              |    |            |       |     |     |    |
| Noorbala 2008*             | Couples CBT vs.<br>Wait List                    | 1 | NA    | NA    | NA    | 70 | Cpl | BDI                          | 24 | Sys. Scrn. | -0.20 | No  | No  | 7  |
|                            |                                                 |   |       |       |       |    | Ind | HRSD,<br>MADRS,<br>HSCL-d-20 |    |            |       |     |     |    |
| Oxman 2008                 | CBT vs.<br>TAU                                  | 2 | -0.03 | -0.44 | 0.38  | 69 | Ind |                              | 6  | Screening  | -0.36 | Yes | No  | 38 |
| Pace 1993                  | CBT vs.<br>Wait List                            | 1 | 0.77  | 0.28  | 1.26  | 43 | Ind | BDI                          | 8  | Other      | -0.16 | No  | Yes | 23 |
| Propst 1992                | CBT vs.<br>Wait List                            | 1 | 0.87  | 0.20  | 1.54  | 11 | Ind | BDI, HRSD                    | 18 | Community  | -0.13 | No  | Yes | 31 |
|                            | Religious CBT <sup>†</sup>                      | 3 | -0.30 | -0.96 | 0.37  | 19 | Ind |                              |    |            |       |     |     |    |
|                            | Pastoral Counseling                             | 2 | -0.08 | -0.87 | 0.72  | 10 | Ind |                              |    |            |       |     |     |    |
| Ravindran 1999             | Grp CBT + Placebo vs.<br>Setraline              | 4 | -0.76 | -1.40 | 0.12  | 22 | Ind | HRSD                         | 12 | Community  | -0.81 | No  | No  | 25 |
|                            | Placebo                                         | 2 | 0.34  | -0.26 | 0.94  | 26 | Ind |                              |    |            |       |     |     |    |
|                            | Grp CBT + Sertraline <sup>†</sup>               | 6 | -0.77 | -1.39 | -0.15 | 25 | Grp |                              |    |            |       |     |     |    |
| Rude 1986                  | Grp CBT vs.<br>Wait List                        | 1 | 0.74  | -0.01 | 1.49  | 16 | Ind | BDI                          | 12 | Community  | 0.27  | No  | Yes | 18 |
|                            | Assertion Skills Grp <sup>‡</sup>               | 3 | -0.32 | -1.07 | 0.43  | 14 | Grp |                              |    |            |       |     |     |    |
| Rush 1977                  | CBT vs.<br>Imipramine                           | 4 | 0.96  | 0.22  | 1.69  | 22 | Ind | BDI, HRSD                    | 20 | Clinical   | 0.99  | Yes | Yes | 32 |

|               |                                           |   |       |       |       |    |     |                  |    |            |       |     |     |    |
|---------------|-------------------------------------------|---|-------|-------|-------|----|-----|------------------|----|------------|-------|-----|-----|----|
| Sallis 1983   | Grp CBT vs.                               |   |       |       |       | 8  | Grp | BDI              | 10 | Community  | -0.43 | No  | No  | 17 |
|               | Anxiety Mgmt Training                     | 3 | 0.30  | -0.67 | 1.26  | 8  | Grp |                  |    |            |       |     |     |    |
|               | Attn Placebo                              | 2 | -0.17 | -1.13 | 0.80  | 8  | Grp |                  |    |            |       |     |     |    |
| Sanders 2000  | Family CBT vs.                            |   |       |       |       | 20 | Fam | BDI              | 12 | Clinical   | -0.39 | No  | No  | 28 |
|               | Family Behavior Ther for Disruptive Child | 2 | 1.53  | 0.79  | 2.27  | 17 | Fam |                  |    |            |       |     |     |    |
| Schmidt 1983  | CBT vs.                                   |   |       |       |       | 12 | Ind | BDI, SDS, MMPI-D | 8  | Community  | 0.52  | No  | No  | 15 |
|               | Wait List                                 | 1 | 1.55  | 0.55  | 2.54  | 10 | Ind |                  |    |            |       |     |     |    |
|               | Small CBT Grp <sup>†</sup>                | 3 | 0.22  | -0.64 | 1.09  | 11 | Grp |                  |    |            |       |     |     |    |
|               | Large CBT Grp <sup>†</sup>                | 3 | 1.03  | 0.11  | 1.94  | 11 | Grp |                  |    |            |       |     |     |    |
|               | Bibliotherapy                             | 2 | 0.16  | -0.69 | 1.00  | 12 | Ind |                  |    |            |       |     |     |    |
| Scott 1990    | CBT vs.                                   |   |       |       |       | 27 | Ind | BDI              | 12 | Sys. Scrn. | 0.80  | Yes | No  | 17 |
|               | Wait List                                 | 1 | 0.58  | 0.00  | 1.16  | 23 | Ind |                  |    |            |       |     |     |    |
|               | Grp CBT 1 <sup>†</sup>                    | 3 | -0.30 | -0.92 | 0.32  | 23 | Grp |                  |    |            |       |     |     |    |
|               | Grp CBT 2 <sup>†</sup>                    | 3 | 0.13  | -0.56 | 0.82  | 23 | Grp |                  |    |            |       |     |     |    |
| Scott 1992    | CBT vs.                                   |   |       |       |       | 29 | Ind | HDRS             | 16 | Clinical   | -0.81 | No  | Yes | 25 |
|               | Amitryptaline                             | 4 | 0.19  | -0.38 | 0.76  | 26 | Ind |                  |    |            |       |     |     |    |
|               | TAU                                       | 1 | 0.27  | -0.29 | 0.82  | 29 | Ind |                  |    |            |       |     |     |    |
| Scott 1997    | Social Work Counseling                    | 2 | -0.33 | -0.89 | 0.22  | 29 | Ind |                  |    |            |       |     |     |    |
|               | CBT vs.                                   |   |       |       |       | 18 | Ind | BDI, HRSD        | 6  | Sys. Scrn. | 0.93  | No  | No  | 22 |
| Segal 2006    | TAU                                       | 2 | 0.50  | -0.21 | 1.21  | 16 | Ind |                  |    |            |       |     |     |    |
|               | CBT vs.                                   |   |       |       |       | 88 | Ind | BDI, HRSD        | 20 | Clinical   | 0.80  | No  | Yes | 39 |
| Selmi 1990    | Antidepressants                           | 4 | 0.00  | -0.35 | 0.36  | 56 | Ind |                  |    |            |       |     |     |    |
|               | CBT vs.                                   |   |       |       |       | 12 | Ind | BDI, HRSD        | 6  | Community  | 0.36  | No  | No  | 17 |
| Serfaty 2009  | Wait List                                 | 1 | 1.28  | 0.37  | 2.19  | 12 | Ind |                  |    |            |       |     |     |    |
|               | Computer CBT                              | 2 | -0.18 | -1.00 | 0.65  | 12 | Ind |                  |    |            |       |     |     |    |
|               | CBT vs.                                   |   |       |       |       | 64 | Ind | BDI              | 12 | Other      | 0.44  | Yes | Yes | 35 |
| Shaffer 1981  | TAU                                       | 2 | 0.18  | -0.19 | 0.55  | 55 | Ind |                  |    |            |       |     |     |    |
|               | Attn Placebo                              | 2 | 0.19  | -0.18 | 0.55  | 58 | Ind |                  |    |            |       |     |     |    |
|               | CBT vs.                                   |   |       |       |       | 12 | Ind | HRSD             | 10 | Sys. Scrn. | -2.09 | No  | No  | 19 |
| Shamsaei 2008 | Interpersonal Grp                         | 2 | 0.74  | -0.12 | 1.59  | 13 | Ind |                  |    |            |       |     |     |    |
|               | Grp CBT <sup>†</sup>                      | 3 | 0.75  | -0.16 | 1.66  | 10 | Ind |                  |    |            |       |     |     |    |
|               | CBT vs.                                   |   |       |       |       | 40 | Ind | BDI              | 8  | Clinical   | 1.67  | No  | No  | 17 |
| Shapiro 1987  | Citalopram                                | 4 | -0.50 | -0.97 | -0.03 | 40 | Ind |                  |    |            |       |     |     |    |
|               | CBT + Citalopram <sup>†</sup>             | 6 | -1.25 | -1.75 | -0.75 | 40 | Ind |                  |    |            |       |     |     |    |
|               | (CBT + Citalopram vs) Citalopram          | 5 | 0.89  | 0.40  | 1.37  | 40 | Ind |                  |    |            |       |     |     |    |
| Shapiro 1987  | CBT vs.                                   |   |       |       |       | 21 | Ind | BDI              | 8  | Community  | 0.14  | No  | No  | 26 |
|               | PDT                                       | 3 | 0.74  | 0.09  | 1.39  | 19 | Ind |                  |    |            |       |     |     |    |
| Shapiro 1994  | CBT vs.                                   |   |       |       |       | 29 | Ind | BDI              | 16 | Community  | 0.31  | No  | Yes | 33 |
|               | PDT (16 sessions)                         | 3 | 0.19  | -0.34 | 0.72  | 28 | Ind |                  |    |            |       |     |     |    |

|                              |                                           |                                       |       |       |       |      |     |                  |                  |            |           |      |     |     |
|------------------------------|-------------------------------------------|---------------------------------------|-------|-------|-------|------|-----|------------------|------------------|------------|-----------|------|-----|-----|
| Shaw 1977                    | PDT (8 sessions)                          | 3                                     | 0.43  | -0.10 | 0.96  | 29   | Ind | BDI, HRSD        | 8                | Clinical   | 0.83      | No   | Yes | 16  |
|                              | Grp CBT vs. Wait List                     | 1                                     | 1.82  | 0.64  | 2.99  | 8    | Ind |                  |                  |            |           |      |     |     |
|                              | Grp Behavior Therapy <sup>†</sup>         | 3                                     | 1.10  | 0.04  | 2.16  | 8    | Grp |                  |                  |            |           |      |     |     |
| Spek 2007                    | Nondirective Grp Therapy                  | 2                                     | 1.30  | 0.21  | 2.39  | 8    | Grp | BDI              | 10               | Community  | -0.08     | Yes  | No  | 30  |
|                              | Grp CBT vs. Wait List                     | 1                                     | 0.32  | 0.03  | 0.60  | 100  | Ind |                  |                  |            |           |      |     |     |
|                              | Internet CBT                              | 2                                     | 0.06  | -0.22 | 0.35  | 102  | Ind |                  |                  |            |           |      |     |     |
| Steuer 1984                  | Grp CBT vs. Grp PDT                       | 3                                     | 0.35  | -0.36 | 1.07  | 17   | Grp | BDI, HRSD, SDS   | 46               | Community  | -0.27     | Yes  | Yes | 22  |
| Strauman 2006                | CBT vs. Self-System Therapy               | 3                                     | -0.25 | -0.87 | 0.36  | 24   | Ind | BDI, HRSD        | 21               | Community  | 0.48      | Yes  | Yes | 35  |
| Stravynski 1994 <sup>§</sup> | Grp CBT vs. CBT + Imipramine <sup>†</sup> | 6                                     | -0.43 | -1.37 | 0.52  | 9    | Grp | BDI, HRSD        | 15               | Clinical   | 0.44      | No   | No  | 12  |
|                              | Taylor 1977                               | CBT vs. Wait List                     | 1     | 2.11  | 0.80  | 3.41 | 7   | Ind              | BDI, D-30        | 6          | Community | 0.21 | No  | No  |
| Teasdale 1984                | Behavior Therapy <sup>†</sup>             | 3                                     | 0.93  | -0.15 | 2.01  | 7    | Ind | BDI, HRSD, MADRS | 20               | Sys. Scrn. | 0.93      | No   | Yes | 21  |
|                              | Cognitive Therapy <sup>†</sup>            | 3                                     | 0.91  | -0.17 | 2.00  | 7    | Ind |                  |                  |            |           |      |     |     |
| Teichman 1995                | CBT vs. TAU - GP Tx                       | 2                                     | 0.85  | 0.13  | 1.57  | 17   | Ind | BDI              | 15               | Clinical   | 0.57      | No   | Yes | 24  |
|                              | Wait List                                 | 1                                     | 0.27  | -0.45 | 1.00  | 15   | Ind |                  |                  |            |           |      |     |     |
| Teri 1986                    | Cognitive Marital Tx                      | 3                                     | -1.00 | -1.76 | -0.23 | 15   | Cpl | BDI              | 12               | Clinical   | 0.26      | No   | No  | 24  |
|                              | Grp CBT vs. Behavior Therapy <sup>†</sup> | 3                                     | -0.69 | -1.25 | -0.13 | 19   | Ind |                  |                  |            |           |      |     |     |
| Thase 2007                   | CBT vs. Augmented Medication              | 4                                     | 0.00  | -0.33 | 0.33  | 86   | Ind | HRSD             | 16               | Clinical   | -1.02     | Yes  | Yes | 37  |
|                              | Medication Switch                         | 4                                     | 0.00  | -0.42 | 0.42  | 117  | Ind |                  |                  |            |           |      |     |     |
| Thomas 1987                  | Grp CBT vs. Self-Control Therapy          | 3                                     | -0.04 | -0.96 | 0.88  | 11   | Grp | BDI, MMPI-D      | 6                | Community  | 0.34      | No   | Yes | 21  |
|                              | Thompson 1987                             | CBT vs. Behavior Therapy <sup>†</sup> | 3     | -0.09 | -0.63 | 0.44 | 30  | Ind              | BDI, HRSD, BSI-D | 20         | Other     | 0.44 | No  | Yes |
| Thompson 2001                | CBT vs. Desipramine                       | 4                                     | 0.34  | -0.18 | 0.86  | 33   | Ind | BDI-LF, HRSD     | 20               | Community  | 0.41      | Yes  | Yes | 31  |
|                              | CBT + Desipramine <sup>†</sup>            | 6                                     | -0.08 | -0.58 | 0.43  | 36   | Ind |                  |                  |            |           |      |     |     |
| Usaf 1990*                   | Grp CBT vs. Wait List                     | 1                                     | NA    | NA    | NA    | 24   | Ind | BDI, SDS         | 10               | Community  | 0.75      | No   | No  | 22  |
|                              | Verduyn 2003                              | Grp CBT vs.                           |       |       |       | 30   | Grp | BDI, HRSD        | 16               | Sys. Scrn. | 0.54      | No   | No  | 32  |

|                          |                                                                                         |   |       |       |      |     |     |                      |    |            |      |     |     |    |  |
|--------------------------|-----------------------------------------------------------------------------------------|---|-------|-------|------|-----|-----|----------------------|----|------------|------|-----|-----|----|--|
|                          | Wait List                                                                               | 1 | 0.21  | -0.47 | 0.90 | 13  | Ind |                      |    |            |      |     |     |    |  |
|                          | Support Grp                                                                             | 2 | 0.06  | -0.47 | 0.59 | 28  | Grp |                      |    |            |      |     |     |    |  |
| Watson 2003              | CBT vs.<br>Process-Experiential                                                         | 3 | 0.04  | -0.39 | 0.48 | 40  | Ind | BDI                  | 16 | Community  | 0.52 | Yes | Yes | 37 |  |
| Wierzbicki 1987          | CBT vs.<br>Wait List                                                                    | 1 | 1.23  | 0.37  | 2.09 | 20  | Ind | BDI, D-30            | 6  | Community  | 0.01 | No  | No  | 11 |  |
|                          | Grp CBT <sup>†</sup>                                                                    | 3 | 0.48  | -0.46 | 1.42 | 9   | Grp |                      |    |            |      |     |     |    |  |
| Wilson 1983              | CBT vs.<br>Wait List                                                                    | 1 | 1.83  | 0.68  | 2.97 | 9   | Ind | BDI, HRSD            | 8  | Community  | 0.58 | No  | Yes | 14 |  |
|                          | Behavior Therapy <sup>‡</sup>                                                           | 3 | -0.20 | -1.19 | 0.79 | 8   | Ind |                      |    |            |      |     |     |    |  |
| Wilson 1995              | CBT vs.<br>Pharma TAU                                                                   | 2 | 0.74  | -0.04 | 1.51 | 14  | Ind | HRSD                 | 12 | Clinical   | 0.80 | No  | Yes | 22 |  |
| Wollersheim 1991         | Grp CBT vs.<br>Wait List                                                                | 1 | -0.11 | -1.12 | 0.91 | 8   | Ind | BDI, MMPI-D          | 10 | Community  | 0.60 | No  | No  | 18 |  |
|                          | Support Grp                                                                             | 2 | -0.20 | -1.22 | 0.82 | 8   | Grp |                      |    |            |      |     |     |    |  |
|                          | Bibliotherapy                                                                           | 2 | -0.45 | -1.48 | 0.58 | 8   | Ind |                      |    |            |      |     |     |    |  |
| Wong 2008a               | Grp CBT vs.<br>Wait List                                                                | 1 | 0.80  | 0.34  | 1.26 | 40  | Ind | BDI                  | 10 | Community  | 0.30 | No  | No  | 28 |  |
| Wong 2008b               | Grp CBT vs.<br>Wait List                                                                | 1 | 0.79  | 0.55  | 1.03 | 159 | Ind | BDI                  | 10 | Community  | 0.30 | No  | No  | 32 |  |
| Wright 2005              | CBT vs.<br>Wait List                                                                    | 1 | 1.17  | 0.37  | 1.96 | 15  | Ind | BDI, HRSD            | 9  | Community  | 0.51 | Yes | Yes | 29 |  |
|                          | Computer CBT                                                                            | 2 | -0.10 | -0.85 | 0.64 | 15  | Ind |                      |    |            |      |     |     |    |  |
| Zeiss 1979               | CBT vs.<br>Wait List                                                                    | 1 | 0.81  | -0.17 | 1.79 | 21  | Ind | MMPI-D               | 12 | Community  | 0.17 | No  | No  | 16 |  |
|                          | Social Skills Training <sup>‡</sup>                                                     | 3 | 0.49  | -0.65 | 1.64 | 7   | Ind |                      |    |            |      |     |     |    |  |
|                          | Pleasant Events Tx <sup>‡</sup>                                                         | 3 | 1.26  | 0.04  | 2.49 | 7   | Ind |                      |    |            |      |     |     |    |  |
| Zerhusen 1995            | Grp CBT vs.<br>TAU                                                                      | 2 | 1.91  | 1.13  | 2.68 | 19  | Grp | BDI                  | 10 | Sys. Scrn. | 2.14 | No  | No  | 16 |  |
|                          | Music Therapy                                                                           | 2 | 1.69  | 0.94  | 2.43 | 19  | Grp |                      |    |            |      |     |     |    |  |
| Zettle 1989              | Grp CBT vs.<br>Comprehensive<br>Distancing<br>Partial Cognitive<br>Therapy <sup>†</sup> | 3 | -0.46 | -1.34 | 0.43 | 11  | Grp | BDI, HRSD            | 12 | Community  | 0.81 | No  | Yes | 21 |  |
|                          |                                                                                         | 3 | -0.42 | -1.32 | 0.48 | 10  | Grp |                      |    |            |      |     |     |    |  |
| Zettle 1992 <sup>§</sup> | CBT vs.<br>Grp CBT <sup>†</sup>                                                         | 3 | 0.37  | -0.44 | 1.18 | 14  | Grp | BDI, HRSD,<br>MMPI-D | 12 | Community  | 0.86 | No  | Yes | 24 |  |
|                          |                                                                                         |   |       |       |      | 8   | Ind |                      |    |            |      |     |     |    |  |
| Zettle 1995*             | CBT vs.<br>Grp CBT                                                                      | 3 | NA    | NA    | NA   | 12  | Grp | BDI, HRSD,<br>MMPI-D | 12 | Community  | 0.91 | No  | Yes | 24 |  |
|                          |                                                                                         |   |       |       |      | 13  | Ind |                      |    |            |      |     |     |    |  |

*Note:* Trial names are first author's last name plus publication year. The first treatment arm listed under the top CBT arm in a given study is the arm that was used to generate the effect size in the primary set of 96 effect sizes, selected through the *a priori* hierarchy.

\* = Studies included in the qualitative assessment but excluded from the meta-regression due to lack of data to extract an effect size.

§ = Studies included in the qualitative assessment but excluded from the meta-regression due to lack of any non-CBT comparator.

† = Comparison dropped from the meta-regression due to CBT vs. other bona fide version of CBT.

‡ = Comparison dropped in the secondary meta-regression analyses that excluded CBT vs. Behavior Therapy.

Comp Type = comparison type, which indicates which category an observation received for the regression model, with 1 = CBT vs. Wait List; 2 = CBT vs. TAU/Attention Placebo/Pill Placebo; 3 = CBT vs. Other Psychotherapy; 4 = CBT vs. Pharmacotherapy; 5 = CBT + Pharmacotherapy vs. Pharmacotherapy; and 6 = CBT vs. CBT + Pharmacotherapy. NA = not available from the report or its authors. CI = confidence interval; ITT = intention-to-treat analysis; Grp = group; Ind = individual; Cpl = couples; Fam = family; Sys. Scrn. = systematic screening; TAU = treatment as usual; CBT = cognitive behavioral therapy; PDT = psychodynamic therapy; IPT = interpersonal therapy; Nonprof. = nonprofessional; Pharma = pharmacotherapy; BDI = Beck Depression Inventory; BSI-D = Brief Symptom Inventory Depression Scale; CES-D = Center for Epidemiological Studies Depression Scale; D-30 = Depression 30 Scale; GDS = Geriatric Depression Scale; HRSD = Hamilton Rating Scale for Depression; MADRS = Montgomery-Asberg Depression Rating Scale; MMPI-D = Minnesota Multiphasic Inventory Depression Scale; SCL-90-D = Symptom Checklist-90 Depression Scale; SDS = Zung Self-Rating Depression Scale. Quality score is the 24-item total score from the RCT-PQRS.



## References for the 120 Randomized Controlled Trials of CBT

- (1) Allart-van Dam E, Hosman CMH, Hoogduin CAL, Schaap CPDR. The Coping With Depression course: Short-term outcomes and mediating effects of a randomized controlled trial in the treatment of subclinical depression. *Behavior Therapy* 2003;34(3):381-396.
- (2) Areán PA, Gum A, McCulloch CE, Bostrom A, Gallagher-Thompson D, Thompson L. Treatment of depression in low-income older adults. *Psychol Aging* 2005 12;20(4):601-609.
- (3) Baker AL, Kavanagh DJ, Kay-Lambkin F, Hunt SA, Lewin TJ, Carr VJ, et al. Randomized controlled trial of cognitive behavioural therapy for coexisting depression and alcohol problems: Short-term outcome. *Addiction* 2010 01;105(1):87-99.
- (4) Barker WA, Scott J, Eccleston D. The Newcastle chronic depression study: Results of a treatment regime. *Int Clin Psychopharmacol* 1987 07;2(3):261-272.
- (5) Barkham M, Rees A, Shapiro DA, Stiles WB, Agnew RM, Halstead J, et al. Outcomes of time-limited psychotherapy in applied settings: Replicating the Second Sheffield Psychotherapy Project. *J Consult Clin Psychol* 1996 10;64(5):1079-1085.
- (6) Barkham M, Shapiro DA, Hardy GE, Rees A. Psychotherapy in two-plus-one sessions: Outcomes of a randomized controlled trial of cognitive-behavioral and psychodynamic-interpersonal therapy for subsyndromal depression. *J Consult Clin Psychol* 1999 04;67(2):201-211.
- (7) Beach SR, O'Leary KD. Treating depression in the context of marital discord: Outcome and predictors of response of marital therapy versus cognitive therapy. *Behavior Therapy* 1992;23(4):507-528.
- (8) Beck AT. Treatment of depression with cognitive therapy and amitriptyline. *Arch Gen Psychiatry* 1985 02;42(2):142-148.
- (9) Beutler LE, Engle D, Mohr D, Daldrup RJ, Bergan J, Meredith K, et al. Predictors of differential response to cognitive, experiential, and self-directed psychotherapeutic procedures. *J Consult Clin Psychol* 1991 04;59(2):333-340.
- (10) Beutler LE, Scogin F, Kirkish P, Schretlen D, Corbishley A, Hamblin D, et al. Group cognitive therapy and alprazolam in the treatment of depression in older adults. *J Consult Clin Psychol* 1987 08;55(4):550-556.
- (11) Blackburn IM, Bishop S, Glen AI, Whalley LJ, Christie JE. The efficacy of cognitive therapy in depression: a treatment trial using cognitive therapy and pharmacotherapy, each alone and in combination *Br J Psychiatry* 1981 Sep;139:181-189.
- (12) Blackburn I-, Moore RG. Controlled acute and follow-up trial of cognitive therapy and pharmacotherapy in out-patients with recurrent depression. *British Journal of Psychiatry* 1997 10;171:328-334.
- (13) Bodenmann G, Plancherel B, Beach SRH, Widmer K, Gabriel B, Meuwly N, et al. Effects of coping-oriented couples therapy on depression: A randomized clinical trial. *J Consult Clin Psychol* 2008 12;76(6):944-954.
- (14) Bolton PG, Fergusson KJ, Parker SM, Orman JD. Randomised controlled trial of cognitive-behavioural therapy and routine GP care for major depression *Med J Aust* 2001 Jul 16;175(2):118-119.

- (15) Bowers WA. Treatment of depressed in-patients: Cognitive therapy plus medication, relaxation plus medication, and medication alone. *British Journal of Psychiatry* 1990 01;156:73-78.
- (16) Bright JJ, Baker KD, Neimeyer RA. Professional and paraprofessional group treatments for depression: A comparison of cognitive-behavioral and mutual support interventions. *J Consult Clin Psychol* 1999 08;67(4):491-501.
- (17) Brown RA, Evans DM, Miller IW, Burgess ES, Mueller TI. Cognitive-behavioral treatment for depression in alcoholism. *J Consult Clin Psychol* 1997 10;65(5):715-726.
- (18) Brown RA, Lewinsohn PM. A psychoeducational approach to the treatment of depression: Comparison of group, individual, and minimal contact procedures. *J Consult Clin Psychol* 1984 10;52(5):774-783.
- (19) Comas-Díaz L. Effects of cognitive and behavioral group treatment on the depressive symptomatology of Puerto Rican women. *J Consult Clin Psychol* 1981 10;49(5):627-632.
- (20) Covi L, Lipman RS. Cognitive behavioral group psychotherapy combined with imipramine in major depression *Psychopharmacol Bull* 1987;23(1):173-176.
- (21) David D, Szentagotai A, Lupu V, Cosman D. Rational emotive behavior therapy, cognitive therapy, and medication in the treatment of major depressive disorder: A randomized clinical trial, posttreatment outcomes, and six-month follow-up. *J Clin Psychol* 2008 06;64(6):728-746.
- (22) DeBerry S, Davis S, Reinhard KE. A comparison of meditation-relaxation and cognitive/behavioral techniques for reducing anxiety and depression in a geriatric population. *J Geriatr Psychiatry* 1989;22(2):231-247.
- (23) DeRubeis RJ, Hollon SD, Amsterdam JD, Shelton RC, Young PR, Salomon RM, et al. Cognitive Therapy vs Medications in the Treatment of Moderate to Severe Depression. *Arch Gen Psychiatry* 2005 04;62(4):409-416.
- (24) Dimidjian S, Hollon SD, Dobson KS, Schmalings KB, Kohlenberg RJ, Addis ME, et al. Randomized trial of behavioral activation, cognitive therapy, and antidepressant medication in the acute treatment of adults with major depression. *J Consult Clin Psychol* 2006 08;74(4):658-670.
- (25) Dowrick C, Dunn G, Ayuso-Mateos J, Dalgard OS, Page H, Lehtinen V, et al. Problem solving treatment and group psychoeducation for depression: Multicentre randomised controlled trial. *BMJ: British Medical Journal* 2000 12;321(7274).
- (26) Dozois DJA, Bieling PJ, Patelis-Siotis I, Hoar L, Chudzik S, McCabe K, et al. Changes in self-schema structure in cognitive therapy for major depressive disorder: A randomized clinical trial. *J Consult Clin Psychol* 2009 12;77(6):1078-1088.
- (27) Drapkin ML, Tate SR, McQuaid JR, Brown SA. Does initial treatment focus influence outcomes for depressed substance abusers? *J Subst Abuse Treat* 2008 10;35(3):343-350.
- (28) Echeburúa E, Salaberría K, de Corral P, Cenea R, Berasategui T. Treatment of mixed anxiety-depression disorder: Long-term outcome. *Behavioural and Cognitive Psychotherapy* 2006 01;34(1):95-101.
- (29) Elkin I, Shea MT, Watkins JT, Imber SD. National Institute of Mental Health Treatment of Depression Collaborative Research Program: General effectiveness of treatments. *Arch Gen Psychiatry* 1989 11;46(11):971-982.
- (30) Emanuels-Zuurveen L, Emmelkamp PMG. Spouse-aided therapy with depressed patients. *Behav Modif* 1997 01;21(1):62-77.

- (31) Emanuels-Zuurveen L, Emmelkamp PMG. Individual behavioural-cognitive therapy v. marital therapy for depression in maritally distressed couples. *British Journal of Psychiatry* 1996 08;169(2):181-188.
- (32) Embling S. The effectiveness of cognitive behavioural therapy in depression. *Nurs Stand* 2002;17(14):33-41.
- (33) Faramarzi M, Alipor A, Esmaelzadeh S, Kheirkhah F, Poladi K, Pash H. Treatment of depression and anxiety in infertile women: Cognitive behavioral therapy versus fluoxetine. *J Affect Disord* 2008 05;108(1-2):159-164.
- (34) Fleming BM, Thornton DW. Coping skills training as a component in the short-term treatment of depression. *J Consult Clin Psychol* 1980 10;48(5):652-654.
- (35) Floyd M, Scogin F, McKendree-Smith N, Floyd DL, Rokke PD. Cognitive Therapy for Depression: A Comparison of Individual Psychotherapy and Bibliotherapy for Depressed Older Adults. *Behav Modif* 2004 03;28(2):297-318.
- (36) Foster RP. Treating depression in vulnerable urban women: a feasibility study of clinical outcomes in community service settings *Am J Orthopsychiatry* 2007 Jul;77(3):443-453.
- (37) Fremont J, Craighead LW. Aerobic exercise and cognitive therapy in the treatment of dysphoric moods. *Cognitive Therapy and Research* 1987 04;11(2):241-251.
- (38) Fry PS. Cognitive training and cognitive-behavioral variables in the treatment of depression in the elderly. *Clinical Gerontologist: The Journal of Aging and Mental Health* 1984;3(1):25-45.
- (39) Gallagher DE, Thompson LW. Treatment of major depressive disorder in older adult outpatients with brief psychotherapies. *Psychotherapy: Theory, Research & Practice* 1982;19(4):482-490.
- (40) Gallagher-Thompson D, Steffen AM. Comparative effects of cognitive-behavioral and brief psychodynamic psychotherapies for depressed family caregivers. *J Consult Clin Psychol* 1994 06;62(3):543-549.
- (41) Gardner P, Oei TP. Depression and self-esteem: An investigation that used behavioral and cognitive approaches to the treatment of clinically depressed clients. *J Clin Psychol* 1981 01;37(1):128-135.
- (42) Hamdan-Mansour A, Puskar K, Bandak AG. Effectiveness of cognitive-behavioral therapy on depressive symptomatology, stress and coping strategies among Jordanian university students. *Issues Ment Health Nurs* 2009 03;30(3):188-196.
- (43) Haringsma R, Engels GI, Cuijpers P, Spinhoven P. Effectiveness of the Coping With Depression (CWD) course for older adults provided by the community-based mental health care system in the Netherlands: A randomized controlled field trial. *International Psychogeriatrics* 2006 06;18(2):307-325.
- (44) Hegerl U, Hautzinger M, Mergl R, Kohnen R, Schütze M, Scheunemann W, et al. Effects of pharmacotherapy and psychotherapy in depressed primary-care patients: A randomized, controlled trial including a patients' choice arm. *International Journal of Neuropsychopharmacology* 2010 02;13(1):31-44.
- (45) Hogg JA, Deffenbacher JL. A comparison of cognitive and interpersonal-process group therapies in the treatment of depression among college students. *Journal of Counseling Psychology* 1988 07;35(3):304-310.
- (46) Hollon SD, DeRubeis RJ, Evans MD, Wiemer MJ. Cognitive therapy and pharmacotherapy for depression: Singly and in combination. *Arch Gen Psychiatry* 1992 10;49(10):774-781.

- (47) Jacobson NS, Dobson KS, Truax PA, Addis ME, Koerner K, Gollan JK, et al. A component analysis of cognitive-behavioral treatment for depression. *J Consult Clin Psychol* 1996 04;64(2):295-304.
- (48) Jacobson NS, Dobson K, Fruzzetti AE, Schmaling KB, Salusky S. Marital therapy as a treatment for depression. *J Consult Clin Psychol* 1991 08;59(4):547-557.
- (49) Jarrett RB, Schaffer M, McIntire D, Witt-Browder A, Kraft D, Risser RC. Treatment of atypical depression with cognitive therapy or phenelzine: A double-blind, placebo-controlled trial. *Arch Gen Psychiatry* 1999 05;56(5):431-437.
- (50) Kay-Lambkin F, Baker AL, Lewin TJ, Carr VJ. Computer-based psychological treatment for comorbid depression and problematic alcohol and/or cannabis use: A randomized controlled trial of clinical efficacy. *Addiction* 2009 03;104(3):378-388.
- (51) Keller MB, McCullough JP, Klein DN, Arnow B, Dunner DL, Gelenberg AJ, et al. A comparison of nefazodone, the cognitive behavioral-analysis system of psychotherapy, and their combination for the treatment of chronic depression. *N Engl J Med* 2000 05;342(20):1462-1470.
- (52) Kim W, Lim SK, Chung EJ, Woo JM. The effect of cognitive behavior therapy-based psychotherapy applied in a forest environment on physiological changes and remission of major depressive disorder *Psychiatry Investig* 2009 Dec;6(4):245-254.
- (53) King M, Sibbald B, Lloyd M, Gabbay M, Byford S. *Health Technol Assess* 2000;4(19):1-93.
- (54) Kocsis JH, Gelenberg AJ, Rothbaum BO, Klein DN, Trivedi MH, Manber R, et al. Cognitive behavioral analysis system of psychotherapy and brief supportive psychotherapy for augmentation of antidepressant nonresponse in chronic depression: The REVAMP trial. *Arch Gen Psychiatry* 2009 11;66(11):1178-1188.
- (55) Laidlaw K, Davidson K, Toner H, Jackson G, Clark S, Law J, et al. A randomised controlled trial of cognitive behaviour therapy vs treatment as usual in the treatment of mild to moderate late life depression. *Int J Geriatr Psychiatry* 2008 08;23(8):843-850.
- (56) LaPointe KA, Rimm DC. Cognitive, assertive, and insight-oriented group therapies in the treatment of reactive depression in women. *Psychotherapy: Theory, Research & Practice* 1980;17(3):312-321.
- (57) Luty SE, Carter JD, McKenzie JM, Rae AM, Frampton CMA, Mulder RT, et al. Randomised controlled trial of interpersonal psychotherapy and cognitive-behavioural therapy for depression. *British Journal of Psychiatry* 2007 06;190:496-502.
- (58) Maynard CK. Comparison of effectiveness of group interventions for depression in women. *Arch Psychiatr Nurs* 1993 10;7(5):277-283.
- (59) McBride C, Atkinson L, Quilty LC, Bagby RM. Attachment as moderator of treatment outcome in major depression: A randomized control trial of interpersonal psychotherapy versus cognitive behavior therapy. *J Consult Clin Psychol* 2006 12;74(6):1041-1054.
- (60) McCabe MP, McGillivray JA, Newton DC. Effectiveness of treatment programmes for depression among adults with mild/moderate intellectual disability. *Journal of Intellectual Disability Research* 2006 04;50(4):239-247.
- (61) McKnight DL, Nelson-Gray R, Barnhill J. Dexamethasone suppression test and response to cognitive therapy and antidepressant medication. *Behavior Therapy* 1992;23(1):99-111.
- (62) McNamara K, Horan JJ. Experimental construct validity in the evaluation of cognitive and behavioral treatments for depression. *Journal of Counseling Psychology* 1986 01;33(1):23-30.

- (63) Miller IW, Keitner GI, Ryan CE, Solomon DA, Cardemil EV, Beevers CG. Treatment Matching in the Posthospital Care of Depressed Patients. *Am J Psychiatry* 2005 11;162(11):2131-2138.
- (64) Miller IW, Norman WH, Keitner GI, Bishop SB. Cognitive-behavioral treatment of depressed inpatients. *Behavior Therapy* 1989;20(1):25-47.
- (65) Miranda J, Azocar F, Organista KC, Dwyer E, Areane P. Treatment of depression among impoverished primary care patients from ethnic minority groups *Psychiatr Serv* 2003 Feb;54(2):219-225.
- (66) Miranda J, Chung JY, Green BL, Krupnick J, Siddique J, Revicki DA, et al. Treating Depression in Predominantly Low-Income Young Minority Women: A Randomized Controlled Trial. *JAMA: Journal of the American Medical Association* 2003 07;290(1):57-65.
- (67) Miranda J, Muñoz RF. Intervention for minor depression in primary care patients. *Psychosom Med* 1994 03;56(2):136-141.
- (68) Moak DH, Anton RF, Latham PK, Voronin KE, Waid RL, Durazo-Arvizu R. Sertraline and cognitive behavioral therapy for depressed alcoholics: Results of a placebo-controlled trial. *J Clin Psychopharmacol* 2003 12;23(6):553-562.
- (69) Murphy GE, Carney RM, Knesevich MA, Wetzel RD. Cognitive behavior therapy, relaxation training, and tricyclic antidepressant medication in the treatment of depression. *Psychol Rep* 1995 10;77(2):403-420.
- (70) Murphy GE, Simons AD, Wetzel RD, Lustman PJ. Cognitive therapy and pharmacotherapy: Singly and together in the treatment of depression. *Arch Gen Psychiatry* 1984;41:33-41.
- (71) Neimeyer RA, Weiss ME. Cognitive and symptomatic predictors of outcome of group therapies for depression. *Journal of Cognitive Psychotherapy* 1990;4(1):23-32.
- (72) Nezu AM, Perri MG. Social problem-solving therapy for unipolar depression: An initial dismantling investigation. *J Consult Clin Psychol* 1989 06;57(3):408-413.
- (73) Noorbala AA, Ramazanzadeh F, Malekafzali H, Abedinia N, Forooshani AR, Shariat M, et al. Effects of a psychological intervention on depression in infertile couples *Int J Gynaecol Obstet* 2008 Jun;101(3):248-252.
- (74) Oxman TE, Hegel MT, Hull JG, Dietrich AJ. Problem-solving treatment and coping styles in primary care for minor depression. *J Consult Clin Psychol* 2008 12;76(6):933-943.
- (75) Pace TM, Dixon DN. Changes in depressive self-schemata and depressive symptoms following cognitive therapy. *Journal of Counseling Psychology* 1993 07;40(3):288-294.
- (76) Propst LR, Ostrom R, Watkins P, Dean T, Mashburn D. Comparative efficacy of religious and nonreligious cognitive-behavioral therapy for the treatment of clinical depression in religious individuals. *J Consult Clin Psychol* 1992 02;60(1):94-103.
- (77) Ravindran AV, Anisman H, Merali Z, Charbonneau Y, Telner J, Bialik RJ, et al. Treatment of primary dysthymia with group cognitive therapy and pharmacotherapy: Clinical symptoms and functional impairments. *Am J Psychiatry* 1999 10;156(10):1608-1617.
- (78) Rude SS. Relative benefits of assertion or cognitive self-control treatment for depression as a function of proficiency in each domain. *J Consult Clin Psychol* 1986 06;54(3):390-394.
- (79) Rush AJ, Beck AT, Kovacs M, Hollon SD. Comparative efficacy of cognitive therapy and pharmacotherapy in the treatment of depressed outpatients. *Cog Ther Res* 1977;1(1):17-37.
- (80) Sallis JF. Anxiety and depression management for the elderly. *Int J Behav Geriatr* 1983;1(4):3-12.

- (81) Sanders MR, McFarland M. Treatment of depressed mothers with disruptive children: A controlled evaluation of cognitive behavioral family intervention. *Behavior Therapy* 2000;31(1):89-112.
- (82) Schmidt MM, Miller WR. Amount of therapist contact and outcome in a multidimensional depression treatment program. *Acta Psychiatr Scand* 1983 05;67(5):319-332.
- (83) Scott AIF, Freeman CPL. Edinburgh primary care depression study: Treatment outcome, patient satisfaction, and cost after 16 weeks. *BMJ* 1992;304(4):883-887.
- (84) Scott C, Tacchi MJ, Jones R, Scott J. Acute and one-year outcome of a randomised controlled trial of brief cognitive therapy for major depressive disorder in primary care. *British Journal of Psychiatry* 1997 08;171:131-134.
- (85) Scott MJ, Stradling SG. Group cognitive therapy for depression produces clinically significant reliable change in community-based settings. *Behavioural Psychotherapy* 1990 01;18(1):1-19.
- (86) Segal ZV, Kennedy S, Gemar M, Hood K, Pedersen R, Buis T. Cognitive Reactivity to Sad Mood Provocation and the Prediction of Depressive Relapse. *Arch Gen Psychiatry* 2006 07;63(7):749-755.
- (87) Selmi PM, Klein MH, Greist JH, Sorrell SP. Computer-administered cognitive-behavioral therapy for depression. *Am J Psychiatry* 1990 01;147(1):51-56.
- (88) Serfaty MA, Haworth D, Blanchard M, Buszewicz M, Murad S, King M. Clinical effectiveness of individual cognitive behavioral therapy for depressed older people in primary care: A randomized controlled trial. *Arch Gen Psychiatry* 2009 12;66(12):1332-1340.
- (89) Shaffer CS, Shapiro J, Sank LI, Coghlan DJ. Positive changes in depression, anxiety, and assertion following individual and group cognitive behavior therapy intervention. *Cognitive Therapy and Research* 1981 06;5(2):149-157.
- (90) Shamsaei F, Rahimi A, Zarabian MK, Sedehi M. Efficacy of pharmacotherapy and cognitive therapy, alone and in combination in major depressive disorder. *Hong Kong J Psychiatry* 2008 06;18(2):76-80.
- (91) Shapiro DA, Barkham M, Rees A, Hardy GE, Reynolds S, Startup M. Effects of treatment duration and severity of depression on the effectiveness of cognitive-behavioral and psychodynamic-interpersonal psychotherapy. *J Consult Clin Psychol* 1994 06;62(3):522-534.
- (92) Shapiro DA, Firth J. Prescriptive v. exploratory psychotherapy: Outcomes of the Sheffield Psychotherapy Project. *British Journal of Psychiatry* 1987 12;151:790-799.
- (93) Shaw BF. Comparison of cognitive therapy and behavior therapy in the treatment of depression. *J Consult Clin Psychol* 1977 08;45(4):543-551.
- (94) Spek V, Nykliček I, Smits N, Cuijpers P, Riper H, Keyzer J, et al. Internet-based cognitive behavioural therapy for subthreshold depression in people over 50 years old: A random controlled clinical trial. *Psychological Medicine: A Journal of Research in Psychiatry and the Allied Sciences* 2007 12;37(12):1797-1806.
- (95) Steuer JL, Mintz J, Hammen CL, Hill Jarvik LF, McCarley T, Motoike P, et al. Cognitive-behavioral and psychodynamic group psychotherapy in treatment of geriatric depression. *J Consulting Clin Psychol* 1984;52(2):180-189.
- (96) Strauman TJ, Vieth AZ, Merrill KA, Kolden GG, Woods TE, Klein MH, et al. Self-system therapy as an intervention for self-regulatory dysfunction in depression: A randomized comparison with cognitive therapy. *J Consult Clin Psychol* 2006 04;74(2):367-376.

- (97) Stravynski A, Verreault R, Gaudette G, Langlois R. The treatment of depression with group behavioural-cognitive therapy and imipramine. *The Canadian Journal of Psychiatry / La Revue canadienne de psychiatrie* 1994 09;39(7):387-390.
- (98) Taylor FG, Marshall WL. Experimental analysis of a cognitive-behavioral therapy for depression. *Cog Ther Res* 1977;1(1):59-72.
- (99) Teasdale JD, Fennell MJ, Hibbert GA, Amies PL. Cognitive therapy for major depressive disorder in primary care. *British Journal of Psychiatry* 1984 04;144:400-406.
- (100) Teichman Y, Bar-El Z, Shor H, Sirota P. A comparison of two modalities of cognitive therapy (individual and marital) in treating depression. *Psychiatry: Interpersonal and Biological Processes* 1995 05;58(2):136-148.
- (101) Teri L, Lewinsohn PM. Individual and group treatment of unipolar depression: Comparison of treatment outcome and identification of predictors of successful treatment outcome. *Behavior Therapy* 1986 06;17(3):215-228.
- (102) Thase ME, Friedman ES, Biggs MM, Wisniewski SR, Trivedi MH, Luther JF, et al. Cognitive therapy versus medication in augmentation and switch strategies as second-step treatments: A STAR\*D report. *Am J Psychiatry* 2007 05;164(5):739-752.
- (103) Thomas JR, Petry RA, Goldman JR. Comparison of cognitive and behavioral self-control treatments of depression. *Psychol Rep* 1987 06;60(3):975-982.
- (104) Thompson LW, Coon DW, Gallagher-Thompson D, Sommer BR, Koin D. Comparison of desipramine and cognitive/behavioral therapy in the treatment of elderly outpatients with mild-to-moderate depression. *The American Journal of Geriatric Psychiatry* 2001;9(3):225-240.
- (105) Thompson LW, Gallagher D, Breckenridge JS. Comparative effectiveness of psychotherapies for depressed elders. *J Consult Clin Psychol* 1987 06;55(3):385-390.
- (106) Usaf SO, Kavanagh DJ. Mechanisms of improvement in treatment for depression: Test of a self-efficacy and performance model. *Journal of Cognitive Psychotherapy* 1990;4(1):51-70.
- (107) Verduyn C, Barrowclough C, Roberts J, Tarrier N, Harrington R. Maternal depression and child behaviour problems: Randomised placebo-controlled trial of a cognitive-behavioural group intervention. *British Journal of Psychiatry* 2003 10;183(4):342-348.
- (108) Watson JC, Gordon LB, Stermac L, Kalogerakos F, Steckley P. Comparing the effectiveness of process-experiential with cognitive-behavioral psychotherapy in the treatment of depression. *J Consult Clin Psychol* 2003 08;71(4):773-781.
- (109) Wierzbicki M, Bartlett TS. The efficacy of group and individual cognitive therapy for mild depression. *Cognitive Therapy and Research* 1987 06;11(3):337-342.
- (110) Wilson KCM, Scott M, Abou-Saleh R, Burns R, Copeland JRM. Long-term effects of cognitive-behavioral therapy and lithium therapy on depression in the elderly. *BJP* 1995;167:653-658.
- (111) Wilson PH, Goldin JC, Charbonneau-Powis M. Comparative efficacy of behavioral and cognitive treatments of depression. *Cognitive Therapy and Research* 1983 04;7(2):111-124.
- (112) Wollersheim JP, Wilson GL. Group treatment of unipolar depression: A comparison of coping, supportive, bibliotherapy, and delayed treatment groups. *Professional Psychology: Research and Practice* 1991 12;22(6):496-502.

- (113) Wong DFK. Cognitive and health-related outcomes of group cognitive behavioural treatment for people with depressive symptoms in Hong Kong: Randomized wait-list control study. *Aust N Z J Psychiatry* 2008;42(8):702-711.
- (114) Wong DFK. Cognitive behavioral treatment groups for people with chronic depression in Hong Kong: A randomized wait-list control design. *Depress Anxiety* 2008;25(2):142-148.
- (115) Wright JH, Wright AS, Albano AM, Basco MR, Goldsmith LJ, Raffield T, et al. Computer-Assisted Cognitive Therapy for Depression: Maintaining Efficacy While Reducing Therapist Time. *Am J Psychiatry* 2005 06;162(6):1158-1164.
- (116) Zeiss AM, Lewinsohn PM, Muñoz RF. Nonspecific improvement effects in depression using interpersonal skills training, pleasant activity schedules, or cognitive training. *J Consult Clin Psychol* 1979 06;47(3):427-439.
- (117) Zerhusen JD, Boyle K, Wilson W. Out of the darkness: Group cognitive therapy for depressed elderly. *J Psychosoc Nurs Mental H Svcs* 1991;29(9):16-21.
- (118) Zettle RD, Haflich JL, Reynolds RA. Responsivity of cognitive therapy as a function of treatment format and client personality dimensions. *J Clin Psychol* 1992 11;48(6):787-797.
- (119) Zettle RD, Herring EL. Treatment utility of the sociotropy/autonomy distinction: Implications for cognitive therapy. *J Clin Psychol* 1995 03;51(2):280-289.
- (120) Zettle RD, Rains JC. Group cognitive and contextual therapies in treatment of depression. *J Clin Psychol* 1989 05;45(3):436-445.



# The Randomized Controlled Trial of Psychotherapy Quality Rating Scale (RCT-PQRS)

*Please rate all items on the basis of the designated paper(s) describing the study. Items #4, #5, #9 and #16 specifically rate the **description** of certain elements of the study. All other items are designed to capture both **description** and **quality** of the study's elements. For these items, when non-standard elements are described, **adequate justification** of this measure or method is required to score a 2.*

## Description of subjects

**Item #1 Diagnostic method and criteria for inclusion and exclusion**

- 0 = poor description and inappropriate method/criteria
- 1 = full description *or* appropriate method/criteria
- 2 = full description *and* appropriate method/criteria

**Item #2 Documentation or demonstration of reliability of diagnostic methodology**

- 0 = poor or no reliability documentation
- 1 = brief reliability documentation (documentation in the literature is sufficient, even if it is not explicitly cited)
- 2 = full reliability documentation (documentation of within-study reliability necessary)

**Item #3 Description of relevant comorbidities**

- 0 = poor or no description of relevant comorbidities
- 1 = brief description of relevant comorbidities
- 2 = full description of relevant comorbidities

**Item #4 Description of numbers of subjects screened, included, and excluded**

- 0 = poor or no description of numbers screened, included, and excluded
- 1 = brief description of numbers screened, included, and excluded
- 2 = full description of numbers screened, included, and excluded

## Definition and delivery of treatment

**Item #5 Treatment(s) (including control/comparison groups) are sufficiently described or referenced to allow for replication**

- 0 = poor or no treatment description or references
- 1 = brief treatment description or references (also if full description of one group and poor description of another)
- 2 = full treatment description or references (manual not required)

**Item #6 Method to demonstrate that treatment being studied is treatment being delivered (only satisfied by supervision if transcripts or tapes are explicitly reviewed)**

- 0 = poor or no adherence reporting
- 1 = brief adherence reporting with standardized measure *or* full adherence reporting with non-standardized measure (e.g., non-independent rater)
- 2 = full adherence reporting with standardized measure (must be quantitative and completed by an independent rater)

**Item #7 Therapist training and level of experience in the treatment(s) under investigation**

- 0 = poor description and under-qualified therapists
- 1 = full description *or* well-qualified therapists
- 2 = full description *and* well-qualified therapists

Item #8 **Therapist supervision while treatment is being provided**

- 0 = poor description and inadequate therapist supervision
- 1 = full description *or* adequate therapist supervision
- 2 = full description *and* adequate therapist supervision

Item #9 **Description of concurrent treatments (e.g., medication) allowed and administered during course of study** (if patients on medication are included, a rating of 2 requires full reporting of what medications were used; if patients on medications are excluded, this alone is sufficient for a rating of 2).

- 0 = poor or no description of concurrent treatments
- 1 = brief description of concurrent treatments
- 2 = full description of concurrent treatments

## Outcome measures

Item #10 **Validated outcome measure(s) (either established or newly standardized)**

- 0 = poor or no validation of outcome measure(s)
- 1 = brief validation of outcome measure(s) (shown or cited)
- 2 = full validation of outcome measure(s) (shown or cited)

Item #11 **Primary outcome measure(s) specified in advance** (though does not need to be stated explicitly for a rating of 2)

- 0 = poor or no specification of primary outcome measure(s) in advance
- 1 = brief specification of primary outcome measure(s) in advance
- 2 = full specification of primary outcome measure(s) in advance

Item #12 **Outcome assessment by raters blinded to treatment group and with established reliability**

- 0 = poor or no blinding of raters to treatment group (e.g., rating by therapist, non-blind independent rater, or patient self-report) and reliability not reported
- 1 = blinding of independent raters to treatment group *or* established reliability
- 2 = blinding of independent raters to treatment group *and* established reliability

Item #13 **Discussion of safety and adverse events during study treatment(s)**

- 0 = poor or no discussion of safety and adverse events
- 1 = brief discussion of safety and adverse events
- 2 = full discussion of safety and adverse events

Item #14 **Assessment of long-term post-termination outcome** (should not be penalized for failure to follow comparison group if this is a wait-list or non-treatment group that is subsequently referred for active treatment)

- 0 = poor or no post-termination assessment of outcome
- 1 = medium-term assessment of post-termination outcome (2 to 12 months post-termination)
- 2 = long-term assessment of post-termination outcome (greater or equal to 12 months post-termination)

## Data analysis

Item #15 **Intent-to-treat method for data analysis involving primary outcome measure**

- 0 = no description or no intent-to-treat analysis with primary outcome measure
- 1 = partial intent-to-treat analysis with primary outcome measure
- 2 = full intent-to-treat analysis with primary outcome measure

Item #16 **Description of dropouts and withdrawals**

- 0 = poor or no description of dropouts and withdrawals
- 1 = brief description of dropouts and withdrawals
- 2 = full description of dropouts and withdrawals (must be explicitly stated and include reasons for dropouts and withdrawals)

Item #17 **Appropriate statistical tests** (e.g., use of Bonferroni correction, longitudinal data analysis, adjustment only for a priori identified confounders)

0 = inappropriate statistics, extensive data dredging, or no information about appropriateness of statistics

1 = moderately appropriate, though unsophisticated, statistics and/or moderate data dredging

2 = fully appropriate statistics and minimal data dredging in primary findings

Item #18 **Adequate sample size**

0 = inadequate justification and inadequate sample size

1 = adequate justification *or* adequate sample size

2 = adequate justification *and* adequate sample size

Item #19 **Appropriate consideration of therapist and site effects**

0 = therapist and site effects not discussed or considered

1 = therapist and site effects discussed *or* considered statistically

2 = therapist and site effects discussed *and* considered statistically

## Treatment assignment

Item #20 **A priori relevant hypotheses that justify comparison group(s)**

0 = poor or no justification of comparison group(s)

1 = brief or incomplete justification of comparison group(s)

2 = full justification of comparison group(s)

Item #21 **Comparison group(s) from same population and time-frame as experimental group**

0 = comparison group(s) from significantly different population and/or time-frame

1 = comparison group(s) from moderately different population and/or time frame

2 = comparison group(s) from same population and time-frame

Item #22 **Randomized assignment to treatment groups**

0 = poor (e.g., pseudo-randomization, sequential assignment) or no randomization

1 = adequate but poorly defined randomization procedure

2 = full and appropriate method of randomization performed after screening and baseline assessment

## Overall quality of study

Item #23 **Balance of allegiance to types of treatment by practitioners**

0 = no information or poor balance of allegiance to treatments by study therapists (e.g., therapy in experimental and control groups both administered by therapists with strong allegiance to therapy being tested in the experimental group)

1 = some balance of allegiance to treatments by study therapists

2 = full balance of allegiance to treatments (e.g., therapies administered by therapists with allegiance to respective techniques)

Item #24 **Conclusions of study justified by sample, measures, and data analysis, as presented**

(note: useful to look at conclusions as stated in study abstract)

0 = poor or no justification of conclusions from results as presented or insufficient information to evaluate (e.g., sample or treatment insufficiently documented, data analysis does not support conclusions, or numbers of withdrawals or dropouts makes findings unsupported)

1 = some conclusions of study justified or partial information presented to evaluate

2 = all conclusions of study justified and complete information presented to evaluate

## Omnibus Rating

Please provide an overall rating of the **quality of the study** taking into account the adequacy of description, the quality of study design, data analysis, and justification of conclusions

- 1 = exceptionally poor
- 2 = very poor
- 3 = moderately poor
- 4 = average
- 5 = moderately good
- 6 = very good
- 7 = exceptionally good

**Quality Score** (sum items 1-24) \_\_\_\_\_

**Omnibus Score** \_\_\_\_\_
